# Supplementary figures and images for: Atypical E2Fs inhibit tumor angiogenesis
Source: PubMed Central journal article supplement — Oncogene. 2017 Sep 18;37(2):271–6. doi: 10.1038/onc.2017.336 (PMC5770600; doi:10.1038/onc.2017.336), 2017-09-18

Figure S1

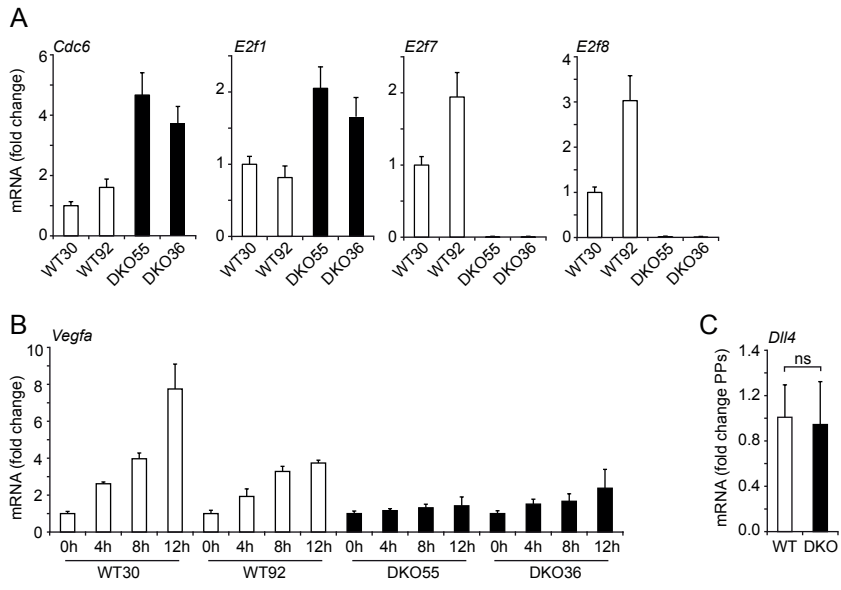

Supplement: onc2017336x3.pdf [file onc2017336x3.pdf]
